# Supplementary material
Source: publisher figshare collection journal article supplement (https://diabetesjournals.figshare.com/articles/dataset/_/16613851)
Supplement: Supplementary file 1 [file 1]

## Checklist for Reporting Human Islet Preparations Used in Research

Adapted from Hart NJ, Powers AC (2018) Progress, challenges, and suggestions for using human islets to understand islet biology and human diabetes. Diabetologia <https://doi.org/10.1007/s00125-018-4772-2>.

|                                                                                                                                                                                                        |                                                                                |
|--------------------------------------------------------------------------------------------------------------------------------------------------------------------------------------------------------|--------------------------------------------------------------------------------|
| <b>Manuscript DOI:</b> <a href="https://doi.org/10.2337/DB21-0170">https://doi.org/10.2337/DB21-0170</a> (Example, <a href="https://doi.org/10.2337/db18-1234">https://doi.org/10.2337/db18-1234</a> ) |                                                                                |
| <b>Title:</b> Syntaxin 4 enrichment in $\beta$ -cells prevents conversion to autoimmune diabetes in non-obese diabetic (NOD) mice                                                                      |                                                                                |
| <b>Author list:</b> Eunjin Oh, Erika M. McCown, Miwon Ahn, Pablo A. Garcia, Sergio Branciamore, Shanshan Tang, De-Fu Zeng, Bart O. Roep <sup>4</sup> and Debbie C. Thurmond                            |                                                                                |
| <b>Corresponding author:</b> Debbie C. Thurmond                                                                                                                                                        | <b>Email address:</b> <a href="mailto:dthurmond@coh.org">dthurmond@coh.org</a> |

| Islet preparation            | 1                   | 2                     | 3                     | 4                     | 5 | 6 | 7 | 8 <sup>a</sup> |
|------------------------------|---------------------|-----------------------|-----------------------|-----------------------|---|---|---|----------------|
| <b>MANDATORY INFORMATION</b> |                     |                       |                       |                       |   |   |   |                |
| Unique identifier            | UNOS ID:<br>ADDV480 | RRID:<br>SAMN08769189 | RRID:<br>SAMN10869303 | RRID:<br>SAMN10977276 |   |   |   |                |
| Donor age (years)            | 52                  | 49                    | 25                    | 52                    |   |   |   |                |
| Donor sex (M/F)              | M                   | M                     | M                     | M                     |   |   |   |                |

|                                                                             |                                                |                                                |                                    |                                                |  |  |  |  |
|-----------------------------------------------------------------------------|------------------------------------------------|------------------------------------------------|------------------------------------|------------------------------------------------|--|--|--|--|
| Donor BMI (kg/m <sup>2</sup> )                                              | 25.4                                           | 29.0                                           | 27.7                               | 27.2                                           |  |  |  |  |
| Donor HbA <sub>1c</sub> or other measure of blood glucose control           | HbA <sub>1c</sub> : 5.5%                       | HbA <sub>1c</sub> : 5.1%                       | HbA <sub>1c</sub> : 5.2%           | HbA <sub>1c</sub> : 5.7%                       |  |  |  |  |
| Origin/source of islets <sup>b</sup>                                        | Southern California Islet cell resource Center | Southern California Islet cell resource Center | IIDP                               | Southern California Islet cell resource Center |  |  |  |  |
| Islet isolation centre                                                      | Southern California Islet cell resource Center | Southern California Islet cell resource Center | The Scharp-Lacy Research Institute | Southern California Islet cell resource Center |  |  |  |  |
| Donor history of diabetes? Yes/No                                           | No                                             | No                                             | No                                 | No                                             |  |  |  |  |
| <b>If Yes, complete the next two lines if this information is available</b> |                                                |                                                |                                    |                                                |  |  |  |  |
| Diabetes duration (years)                                                   |                                                |                                                |                                    |                                                |  |  |  |  |
| Glucose-lowering therapy at time of death <sup>c</sup>                      |                                                |                                                |                                    |                                                |  |  |  |  |

| RECOMMENDED INFORMATION |                        |                        |        |                        |  |  |  |  |
|-------------------------|------------------------|------------------------|--------|------------------------|--|--|--|--|
| Donor cause of death    | Cerebrovascular/Stroke | Cerebrovascular/Stroke | Anoxia | Cerebrovascular/Stroke |  |  |  |  |
| Warm ischaemia time (h) |                        | 0 h                    | 0.5 h  | 0 h                    |  |  |  |  |

|                                                                                   |                                                                                                                                        |                                                                                                                                        |                                                          |                                                                                                                                        |  |  |  |  |
|-----------------------------------------------------------------------------------|----------------------------------------------------------------------------------------------------------------------------------------|----------------------------------------------------------------------------------------------------------------------------------------|----------------------------------------------------------|----------------------------------------------------------------------------------------------------------------------------------------|--|--|--|--|
| Cold ischaemia time (h)                                                           |                                                                                                                                        | No documented                                                                                                                          | 8.4 h                                                    | 8.1 h                                                                                                                                  |  |  |  |  |
| Estimated purity (%)                                                              |                                                                                                                                        | 75%                                                                                                                                    | 95%                                                      | 85%                                                                                                                                    |  |  |  |  |
| Estimated viability (%)                                                           |                                                                                                                                        | 93%                                                                                                                                    | 90%                                                      | 96%                                                                                                                                    |  |  |  |  |
| Total culture time (h) <sup>d</sup>                                               |                                                                                                                                        |                                                                                                                                        | 111 h                                                    |                                                                                                                                        |  |  |  |  |
| Glucose-stimulated insulin secretion or other functional measurement <sup>e</sup> |                                                                                                                                        | Glucose-stimulated insulin release stimulation (SI): 2.6                                                                               | Glucose-stimulated insulin release stimulation (SI): 8.9 | Glucose-stimulated insulin release stimulation (SI): 2.8                                                                               |  |  |  |  |
| Handpicked to purity? Yes/No                                                      |                                                                                                                                        | Yes                                                                                                                                    | Yes                                                      | Yes                                                                                                                                    |  |  |  |  |
| Additional notes                                                                  | We directly picked up the islets, because we are located in the same building with the Southern California Islet cell resource Center. | We directly picked up the islets, because we are located in the same building with the Southern California Islet cell resource Center. |                                                          | We directly picked up the islets, because we are located in the same building with the Southern California Islet cell resource Center. |  |  |  |  |

<sup>a</sup>If you have used more than eight islet preparations, please complete additional forms as necessary

<sup>b</sup>For example, IIDP, ECIT, Alberta IsletCore

<sup>c</sup>Please specify the therapy/therapies

<sup>d</sup>Time of islet culture at the isolation centre, during shipment and at the receiving laboratory

<sup>e</sup>Please specify the test and the results
